# Supplementary material for: Computed tomography-based assessment of sphenoid sinus and sella turcica pneumatization analysis: a retrospective study
Source: PeerJ. 2023 Dec 18;11:e16623. doi: 10.7717/peerj.16623 (PMC10734430; doi:10.7717/peerj.16623)
Supplement: Supplemental Information 1 [file peerj-11-16623-s001.xlsx]

## Sheet: Sayfa1
	Age	Gender	sella type	SFENOİD SİNÜS
	39	e:male	irreguler	INCOMPLETE SELLAR
	17	k: female	irreguler	INCOMPLETE SELLAR
	48	e	irreguler	PRESELLAR
	51	e	irreguler	COMPLETE SELLAR
	73	e	irreguler	PRESELLAR
	62	e	irreguler	COMPLETE SELLAR
	60	k	irreguler	INCOMPLETE SELLAR
	54	k	irreguler	KONKAL
	56	k	irreguler	COMPLETE SELLAR
	73	e	irreguler	PRESELLAR
	14	k	normal	KONKAL
	10	e	normal	KONKAL
	46	k	irreguler	INCOMPLETE SELLAR
	55	k	irreguler	INCOMPLETE SELLAR
	68	k	irreguler	PRESELLAR
	17	e	normal	KONKAL
	46	k	irreguler	INCOMPLETE SELLAR
	60	k	irreguler	INCOMPLETE SELLAR
	63	e	irreguler	COMPLETE SELLAR
	43	k	normal	PRESELLAR
	30	k	normal	COMPLETE SELLAR
	22	e	normal	COMPLETE SELLAR
	56	e	irreguler	COMPLETE SELLAR
	49	e	normal	COMPLETE SELLAR
	58	e	irreguler	COMPLETE SELLAR
	58	e	pyramidal	KONKAL
	51	e	irreguler	INCOMPLETE SELLAR
	38	e	normal	COMPLETE SELLAR
	53	e	normal	COMPLETE SELLAR
	46	k	normal	INCOMPLETE SELLAR
	16	e	normal	COMPLETE SELLAR
	55	e	irreguler	COMPLETE SELLAR
	48	k	normal	PRESELLAR
	53	k	irreguler	INCOMPLETE SELLAR
	62	k	normal	COMPLETE SELLAR
	52	e	normal	INCOMPLETE SELLAR
	41	e	normal	PRESELLAR
	27	k	irreguler	PRESELLAR
	16	e	normal	COMPLETE SELLAR
	51	e	irreguler	COMPLETE SELLAR
	48	e	irreguler	COMPLETE SELLAR
	62	e	irreguler	INCOMPLETE SELLAR
	61	e	irreguler	COMPLETE SELLAR
	49	e	irreguler	COMPLETE SELLAR
	62	e	normal	PRESELLAR
	75	e	irreguler	COMPLETE SELLAR
	42	e	irreguler	INCOMPLETE SELLAR
	91	e	oblıque	COMPLETE SELLAR
	61	e	oblıque	INCOMPLETE SELLAR
	36	e	irreguler	INCOMPLETE SELLAR
	65	e	irreguler	COMPLETE SELLAR
	53	e	normal	COMPLETE SELLAR
	58	e	normal	KONKAL
	68	e	double contur	INCOMPLETE SELLAR
	43	e	irreguler	COMPLETE SELLAR
	16	e	normal	COMPLETE SELLAR
	77	e	irreguler	INCOMPLETE SELLAR
	55	e	irreguler	INCOMPLETE SELLAR
	29	e	irreguler	COMPLETE SELLAR
	43	e	normal	COMPLETE SELLAR
	46	e	normal	PRESELLAR
	48	e	irreguler	COMPLETE SELLAR
	67	e	irreguler	INCOMPLETE SELLAR
	18	e	normal	COMPLETE SELLAR
	11	e	normal	PRESELLAR
	22	k	normal	INCOMPLETE SELLAR
	54	k	normal	INCOMPLETE SELLAR
	54	e	pyramidal	INCOMPLETE SELLAR
	28	k	normal	COMPLETE SELLAR
	45	k	normal	COMPLETE SELLAR
	70	k	irreguler	INCOMPLETE SELLAR
	60	k	normal	PRESELLAR
	20	k	normal	COMPLETE SELLAR
	57	k	normal	COMPLETE SELLAR
	52	k	normal	COMPLETE SELLAR
	43	k	normal	PRESELLAR
	17	e	irreguler	PRESELLAR
	40	e	irreguler	INCOMPLETE SELLAR
	26	k	normal	COMPLETE SELLAR
	20	k	normal	INCOMPLETE SELLAR
	57	e	normal	COMPLETE SELLAR
	66	e	irreguler	INCOMPLETE SELLAR
	64	k	irreguler	COMPLETE SELLAR
	24	k	irreguler	COMPLETE SELLAR
	26	k	normal	COMPLETE SELLAR
	20	k	irreguler	COMPLETE SELLAR
	22	k	normal	INCOMPLETE SELLAR
	35	e	irreguler	COMPLETE SELLAR
	67	e	normal	INCOMPLETE SELLAR
	41	k	irreguler	INCOMPLETE SELLAR
	20	k	irreguler	PRESELLAR
	64	e	irreguler	COMPLETE SELLAR
	56	e	normal	INCOMPLETE SELLAR
	50	e	irreguler	COMPLETE SELLAR
	35	k	irreguler	PRESELLAR
	69	k	irreguler	COMPLETE SELLAR
	68	e	irreguler	COMPLETE SELLAR
	74	e	irreguler	COMPLETE SELLAR
	58	e	normal	PRESELLAR
	47	e	normal	COMPLETE SELLAR
	75	e	irreguler	COMPLETE SELLAR
	48	k	normal	COMPLETE SELLAR
	48	e	irreguler	COMPLETE SELLAR
	64	k	double contur	PRESELLAR
	49	k	normal	PRESELLAR
	57	e	irreguler	COMPLETE SELLAR
	65	k	irreguler	COMPLETE SELLAR
	71	k	irreguler	INCOMPLETE SELLAR
	55	k	irreguler	COMPLETE SELLAR
	12	e	normal	INCOMPLETE SELLAR
	49	e	irreguler	COMPLETE SELLAR
	37	e	irreguler	COMPLETE SELLAR
	20	e	normal	COMPLETE SELLAR
	59	e	normal	COMPLETE SELLAR
	40	e	normal	COMPLETE SELLAR
	18	e	irreguler	COMPLETE SELLAR
	49	k	oblıque	COMPLETE SELLAR
	22	k	normal	INCOMPLETE SELLAR
	39	k	normal	PRESELLAR
	31	e	irreguler	COMPLETE SELLAR
	45	e	double contur	PRESELLAR
	53	k	irreguler	COMPLETE SELLAR
	70	k	irreguler	COMPLETE SELLAR
	32	e	irreguler	COMPLETE SELLAR
	33	e	irreguler	COMPLETE SELLAR
	30	k	normal	PRESELLAR
	23	k	normal	PRESELLAR
	54	k	double contur	COMPLETE SELLAR
	45	k	irreguler	INCOMPLETE SELLAR
	32	k	irreguler	PRESELLAR
	60	k	pyramidal	PRESELLAR
	67	k	irreguler	COMPLETE SELLAR
	66	k	normal	COMPLETE SELLAR
	46	k	irreguler	PRESELLAR
	25	k	normal	PRESELLAR
	51	k	irreguler	INCOMPLETE SELLAR
	56	k	irreguler	INCOMPLETE SELLAR
	23	k	irreguler	COMPLETE SELLAR
	23	e	irreguler	COMPLETE SELLAR
	16	k	normal	COMPLETE SELLAR
	65	k	pyramidal	INCOMPLETE SELLAR
	49	k	normal	COMPLETE SELLAR
	52	k	irreguler	INCOMPLETE SELLAR
	67	k	irreguler	COMPLETE SELLAR
	20	k	irreguler	PRESELLAR
	66	k	normal	PRESELLAR
	30	k	normal	COMPLETE SELLAR
	17	k	irreguler	COMPLETE SELLAR
	48	k	irreguler	COMPLETE SELLAR
	47	k	normal	konkal
	47	k	pyramidal	INCOMPLETE SELLAR
	59	k	normal	COMPLETE SELLAR
	14	e	normal	INCOMPLETE SELLAR
	47	e	irreguler	INCOMPLETE SELLAR
	60	e	double contur	INCOMPLETE SELLAR
	20	e	normal	PRESELLAR
	15	e	irreguler	INCOMPLETE SELLAR
	58	k	irreguler	COMPLETE SELLAR
	47	k	irreguler	INCOMPLETE SELLAR
	49	k	normal	PRESELLAR
	59	k	irreguler	COMPLETE SELLAR
	32	k	irreguler	COMPLETE SELLAR
	67	e	irreguler	COMPLETE SELLAR
	68	e	pyramidal	PRESELLAR
	52	e	normal	PRESELLAR
	43	e	irreguler	INCOMPLETE SELLAR
	43	e	normal	COMPLETE SELLAR
	62	e	irreguler	COMPLETE SELLAR
	50	e	irreguler	COMPLETE SELLAR
	27	e	normal	COMPLETE SELLAR
	29	k	normal	COMPLETE SELLAR
	39	k	normal	INCOMPLETE SELLAR
	71	e	irreguler	COMPLETE SELLAR
	52	k	oblıque	PRESELLAR
	39	k	irreguler	COMPLETE SELLAR
	42	k	normal	INCOMPLETE SELLAR
	36	k	irreguler	COMPLETE SELLAR
	46	k	normal	COMPLETE SELLAR
	75	k	normal	PRESELLAR
	42	k	normal	COMPLETE SELLAR
	39	k	normal	INCOMPLETE SELLAR
	67	e	irreguler	COMPLETE SELLAR
	12	k	normal	PRESELLAR
	31	k	normal	PRESELLAR
	61	e	irreguler	COMPLETE SELLAR
	13	e	normal	INCOMPLETE SELLAR
	57	e	normal	INCOMPLETE SELLAR
	44	e	normal	INCOMPLETE SELLAR
	15	e	normal	INCOMPLETE SELLAR
	58	e	normal	INCOMPLETE SELLAR
	52	e	double contur	INCOMPLETE SELLAR
	49	e	irreguler	COMPLETE SELLAR
	45	e	normal	COMPLETE SELLAR
	53	e	normal	INCOMPLETE SELLAR
	23	e	normal	PRESELLAR
	40	e	normal	COMPLETE SELLAR
	18	e	irreguler	PRESELLAR
	63	e	irreguler	COMPLETE SELLAR
	20	e	irreguler	COMPLETE SELLAR
	41	e	normal	COMPLETE SELLAR
	30	k	normal	INCOMPLETE SELLAR
	63	e	irreguler	INCOMPLETE SELLAR
	59	k	irreguler	COMPLETE SELLAR
	18	e	irreguler	INCOMPLETE SELLAR
	25	e	normal	INCOMPLETE SELLAR
	15	k	normal	INCOMPLETE SELLAR
	21	k	normal	INCOMPLETE SELLAR
	37	e	irreguler	COMPLETE SELLAR
	63	e	irreguler	COMPLETE SELLAR
	13	e	normal	PRESELLAR
	55	e	normal	COMPLETE SELLAR
	45	e	irreguler	INCOMPLETE SELLAR
	61	e	irreguler	COMPLETE SELLAR
	20	e	irreguler	INCOMPLETE SELLAR
	29	e	irreguler	COMPLETE SELLAR
	45	e	irreguler	COMPLETE SELLAR
	24	e	irreguler	COMPLETE SELLAR
	20	e	normal	COMPLETE SELLAR
	45	e	normal	COMPLETE SELLAR
	46	k	normal	INCOMPLETE SELLAR
	29	e	normal	COMPLETE SELLAR
	12	e	normal	INCOMPLETE SELLAR
	47	e	irreguler	COMPLETE SELLAR
	31	e	normal	PRESELLAR
	47	e	normal	COMPLETE SELLAR
	45	e	irreguler	COMPLETE SELLAR
	56	e	oblıque	INCOMPLETE SELLAR
	43	e	irreguler	COMPLETE SELLAR
	17	e	normal	INCOMPLETE SELLAR
	60	e	irreguler	COMPLETE SELLAR
	74	e	irreguler	INCOMPLETE SELLAR
	22	e	oblıque	COMPLETE SELLAR
	26	e	normal	PRESELLAR
	25	e	irreguler	INCOMPLETE SELLAR
	70	e	normal	INCOMPLETE SELLAR
	67	e	irreguler	INCOMPLETE SELLAR
	52	e	irreguler	COMPLETE SELLAR
	59	e	oblıque	INCOMPLETE SELLAR
	57	e	irreguler	COMPLETE SELLAR
	52	e	irreguler	COMPLETE SELLAR
	73	e	irreguler	PRESELLAR
	59	e	irreguler	COMPLETE SELLAR
	21	e	irreguler	COMPLETE SELLAR
	57	e	irreguler	INCOMPLETE SELLAR
	58	e	irreguler	INCOMPLETE SELLAR
	53	e	normal	konkal
	64	e	normal	INCOMPLETE SELLAR
	12	e	oblıque	PRESELLAR
	47	e	normal	COMPLETE SELLAR
	25	e	normal	COMPLETE SELLAR
	52	e	irreguler	COMPLETE SELLAR
	31	e	normal	COMPLETE SELLAR
	34	e	oblıque	COMPLETE SELLAR
	44	e	irreguler	COMPLETE SELLAR
	12	k	normal	INCOMPLETE SELLAR
	55	e	irreguler	COMPLETE SELLAR
	51	k	irreguler	INCOMPLETE SELLAR
	27	k	irreguler	INCOMPLETE SELLAR
	41	k	irreguler	INCOMPLETE SELLAR
	41	k	irreguler	INCOMPLETE SELLAR
	51	k	irreguler	INCOMPLETE SELLAR
	40	e	oblıque	COMPLETE SELLAR
	22	e	normal	INCOMPLETE SELLAR
	35	k	normal	INCOMPLETE SELLAR
	75	e	irreguler	INCOMPLETE SELLAR
	60	e	irreguler	COMPLETE SELLAR
	59	e	irreguler	INCOMPLETE SELLAR
	19	e	normal	INCOMPLETE SELLAR
	14	e	normal	INCOMPLETE SELLAR
	59	e	normal	COMPLETE SELLAR
	66	e	irreguler	INCOMPLETE SELLAR
	54	e	normal	COMPLETE SELLAR
	43	e	irreguler	COMPLETE SELLAR
	39	e	irreguler	INCOMPLETE SELLAR
	77	e	irreguler	INCOMPLETE SELLAR
	44	e	irreguler	COMPLETE SELLAR
	13	e	double contur	PRESELLAR
	51	e	irreguler	INCOMPLETE SELLAR
	54	e	irreguler	COMPLETE SELLAR
	31	e	normal	COMPLETE SELLAR
	57	e	irreguler	INCOMPLETE SELLAR
	57	e	normal	INCOMPLETE SELLAR
	62	e	irreguler	COMPLETE SELLAR
	56	e	normal	COMPLETE SELLAR
	31	e	normal	INCOMPLETE SELLAR
	66	e	irreguler	COMPLETE SELLAR
	59	e	irreguler	COMPLETE SELLAR
	37	e	normal	COMPLETE SELLAR
	54	e	irreguler	INCOMPLETE SELLAR
	18	e	normal	COMPLETE SELLAR
	54	k	irreguler	COMPLETE SELLAR
	77	k	irreguler	PRESELLAR
	54	e	irreguler	INCOMPLETE SELLAR
	57	k	irreguler	INCOMPLETE SELLAR
	46	e	normal	PRESELLAR
	36	k	irreguler	COMPLETE SELLAR
	22	k	normal	INCOMPLETE SELLAR
	35	e	irreguler	COMPLETE SELLAR
	46	k	irreguler	COMPLETE SELLAR
	42	k	normal	COMPLETE SELLAR
	20	k	normal	PRESELLAR
	45	k	normal	PRESELLAR
	56	k	irreguler	INCOMPLETE SELLAR
	27	e	oblıque	INCOMPLETE SELLAR
	15	k	normal	PRESELLAR
	40	k	irreguler	INCOMPLETE SELLAR
	66	e	irreguler	INCOMPLETE SELLAR
	24	e	normal	COMPLETE SELLAR
	31	e	normal	INCOMPLETE SELLAR
	38	e	irreguler	COMPLETE SELLAR
	48	e	irreguler	COMPLETE SELLAR
	23	e	normal	COMPLETE SELLAR
	15	k	normal	COMPLETE SELLAR
	26	k	normal	COMPLETE SELLAR
	55	k	normal	COMPLETE SELLAR
	44	k	normal	PRESELLAR
	33	k	irreguler	COMPLETE SELLAR
	63	e	irreguler	INCOMPLETE SELLAR
	16	e	normal	INCOMPLETE SELLAR
	25	e	normal	INCOMPLETE SELLAR
	35	e	oblıque	PRESELLAR
	48	e	pyramidal	INCOMPLETE SELLAR
	69	e	irreguler	COMPLETE SELLAR
	55	e	normal	COMPLETE SELLAR
	45	e	normal	COMPLETE SELLAR
	16	e	normal	PRESELLAR
	20	k	normal	COMPLETE SELLAR
	55	k	irreguler	COMPLETE SELLAR
	42	e	irreguler	COMPLETE SELLAR
	52	k	normal	COMPLETE SELLAR
	58	e	irreguler	INCOMPLETE SELLAR
	55	e	normal	COMPLETE SELLAR
	42	k	normal	COMPLETE SELLAR
	25	k	normal	COMPLETE SELLAR
	25	k	irreguler	COMPLETE SELLAR
	30	k	normal	COMPLETE SELLAR
	56	k	irreguler	COMPLETE SELLAR
	23	k	irreguler	INCOMPLETE SELLAR
	16	k	normal	konkal
	42	k	irreguler	COMPLETE SELLAR
	37	k	irreguler	PRESELLAR
	43	k	pyramidal	PRESELLAR
	51	k	irreguler	INCOMPLETE SELLAR
	62	k	irreguler	INCOMPLETE SELLAR
	65	e	irreguler	INCOMPLETE SELLAR
	25	e	normal	COMPLETE SELLAR
	44	k	normal	INCOMPLETE SELLAR
	15	k	normal	PRESELLAR
	43	k	normal	COMPLETE SELLAR
	54	k	irreguler	COMPLETE SELLAR
	41	k	normal	COMPLETE SELLAR
	53	k	irreguler	INCOMPLETE SELLAR
	28	k	normal	COMPLETE SELLAR
	56	k	irreguler	INCOMPLETE SELLAR
	78	k	irreguler	INCOMPLETE SELLAR
	11	e	normal	PRESELLAR
	68	e	pyramidal	COMPLETE SELLAR
	77	e	irreguler	COMPLETE SELLAR
	66	e	irreguler	INCOMPLETE SELLAR
	20	k	normal	PRESELLAR
	39	e	irreguler	COMPLETE SELLAR
	63	e	irreguler	INCOMPLETE SELLAR
	39	k	normal	INCOMPLETE SELLAR
	43	k	irreguler	INCOMPLETE SELLAR
	36	e	irreguler	PRESELLAR
	49	e	irreguler	COMPLETE SELLAR
	58	e	irreguler	INCOMPLETE SELLAR
	63	e	irreguler	COMPLETE SELLAR
	8	e	normal	INCOMPLETE SELLAR
	22	e	normal	COMPLETE SELLAR
	50	e	irreguler	COMPLETE SELLAR
	55	e	irreguler	INCOMPLETE SELLAR
	37	k	irreguler	INCOMPLETE SELLAR
	25	k	irreguler	INCOMPLETE SELLAR
	18	e	normal	COMPLETE SELLAR
	50	e	irreguler	COMPLETE SELLAR
	57	e	irreguler	PRESELLAR
	39	e	irreguler	COMPLETE SELLAR
	8	e	normal	konkal
	55	e	irreguler	INCOMPLETE SELLAR
	58	k	normal	INCOMPLETE SELLAR
	63	k	irreguler	COMPLETE SELLAR
	57	k	irreguler	COMPLETE SELLAR
	69	e	irreguler	COMPLETE SELLAR
	51	k	normal	COMPLETE SELLAR
	60	k	irreguler	INCOMPLETE SELLAR
	15	k	normal	INCOMPLETE SELLAR
	35	k	irreguler	COMPLETE SELLAR
	31	e	normal	COMPLETE SELLAR
	25	k	normal	COMPLETE SELLAR
	74	k	irreguler	PRESELLAR
	32	k	normal	COMPLETE SELLAR
	44	k	normal	PRESELLAR
	53	k	irreguler	INCOMPLETE SELLAR
	20	k	normal	INCOMPLETE SELLAR
	52	e	pyramidal	INCOMPLETE SELLAR
	41	e	irreguler	COMPLETE SELLAR
	81	k	irreguler	INCOMPLETE SELLAR
	63	e	irreguler	PRESELLAR
	23	e	irreguler	COMPLETE SELLAR
	57	e	irreguler	INCOMPLETE SELLAR
	22	e	irreguler	INCOMPLETE SELLAR
	52	e	normal	COMPLETE SELLAR
	13	e	normal	INCOMPLETE SELLAR
	58	k	irreguler	PRESELLAR
	54	k	irreguler	PRESELLAR
	44	k	irreguler	COMPLETE SELLAR
	15	e	normal	PRESELLAR
	37	k	normal	PRESELLAR
	20	k	normal	COMPLETE SELLAR
	29	e	normal	INCOMPLETE SELLAR
	47	e	irreguler	PRESELLAR
	33	e	normal	INCOMPLETE SELLAR
	12	k	normal	COMPLETE SELLAR
	64	k	normal	COMPLETE SELLAR
	38	e	normal	INCOMPLETE SELLAR
	59	k	irreguler	INCOMPLETE SELLAR
	20	k	normal	INCOMPLETE SELLAR
	45	k	irreguler	INCOMPLETE SELLAR
	34	e	irreguler	INCOMPLETE SELLAR
